# Supplementary material for: Microwave-assisted hydrothermal selective dissolution and utilisation of hemicellulose in Phyllostachys heterocycla cv. pubescens
Source: Royal Society of Chemistry journal article supplement (doi:10.1039/c7gc02300f), 2017-01-01
Supplement: c7gc02300f1.pdf [file c7gc02300f1.pdf]

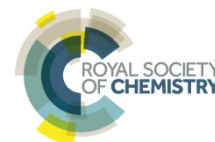

Journal Name

ARTICLE

***Supplementary Information for***  
**Microwave-Assisted Hydrothermal Selective Dissolution and**  
**Utilisation of Hemicellulose in *Phyllostachys heterocycla cv.***  
***pubescens***

Received 00th January 20xx,  
Accepted 00th January 20xx

DOI: 10.1039/x0xx00000x

[www.rsc.org/](http://www.rsc.org/)

Yiping Luo<sup>a,b</sup>, Jiajun Fan<sup>b</sup>, Vitaliy L. Budarin<sup>b</sup>, Changwei Hu<sup>a\*</sup> and James H. Clark<sup>b\*</sup>

<sup>a</sup> Key Laboratory of Green Chemistry and Technology, Ministry of Education, College of Chemistry, Sichuan University, Chengdu, Sichuan 610064, P. R. China.

<sup>b</sup> Green Chemistry Centre of Excellence, Department of Chemistry, University of York, York, YO10 5DD, U.K.

**I. MICROWAVE HYDROTHERMAL CONVERSION OF *PUBESCENS***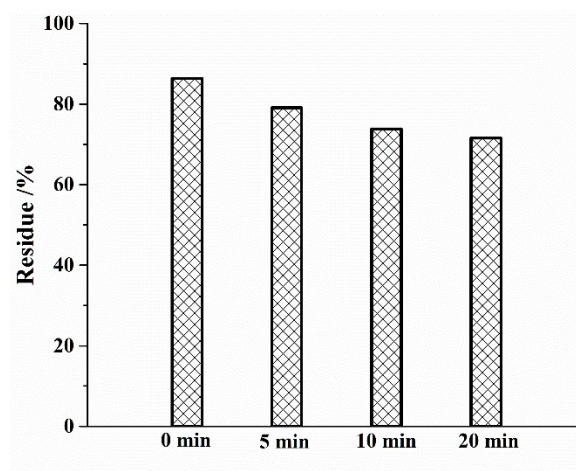

**Figure S1** The variation of residue content with microwave hydrothermal treatment at 180 °C for different time

II.  $^{13}\text{C}$  CPMAS NMR ANALYSIS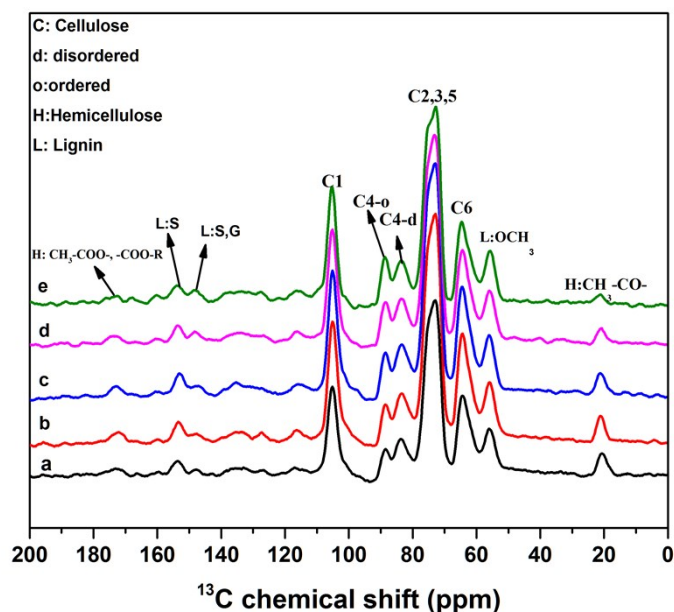

**Figure S2**  $^{13}\text{C}$  CPMAS solid-state NMR spectra of *pubescens* and solid samples after different treatment: a, *pubescens*; b, Residue 140 °C; c, Residue 160 °C; d, Residue 180 °C; e, Residue 200 °C. (Resonance assignment of  $^{13}\text{C}$  CPMAS spectra was given in Table S1)

**Table S1** Resonance assignment of  $^{13}\text{C}$  CPMAS spectra of bamboo and reaction residue give in Figure S2.

| Resonance number | Chemical shift (ppm) | Assignment                                                                                      |
|------------------|----------------------|-------------------------------------------------------------------------------------------------|
| 1                | 171                  | Hemicellulose: -COO-R, CH <sub>3</sub> -COO-                                                    |
| 2                | 153                  | Lignin: S <sub>3(e)</sub> , S <sub>5(e)</sub>                                                   |
| 3                | 147                  | Lignin: S <sub>3(ne)</sub> , S <sub>5(ne)</sub> , G <sub>3(ne, e)</sub> , G <sub>4(ne, e)</sub> |
| 4                | 104                  | Cellulose: C <sub>1</sub>                                                                       |
| 5                | 88                   | Cellulose: C <sub>4</sub> (ordered)                                                             |
| 6                | 83                   | Cellulose: C <sub>4</sub> (disordered)                                                          |
| 7                | 74-72                | Cellulose: C <sub>2</sub> , C <sub>3</sub> , C <sub>5</sub>                                     |
| 8                | 64                   | Cellulose: C <sub>6</sub> (ordered), C <sub>6</sub> (disordered)                                |
| 9                | 56                   | Lignin: OCH <sub>3</sub>                                                                        |
| 10               | 21                   | Hemicellulose: CH <sub>3</sub> -COO-                                                            |

## III. SEM ANALYSIS

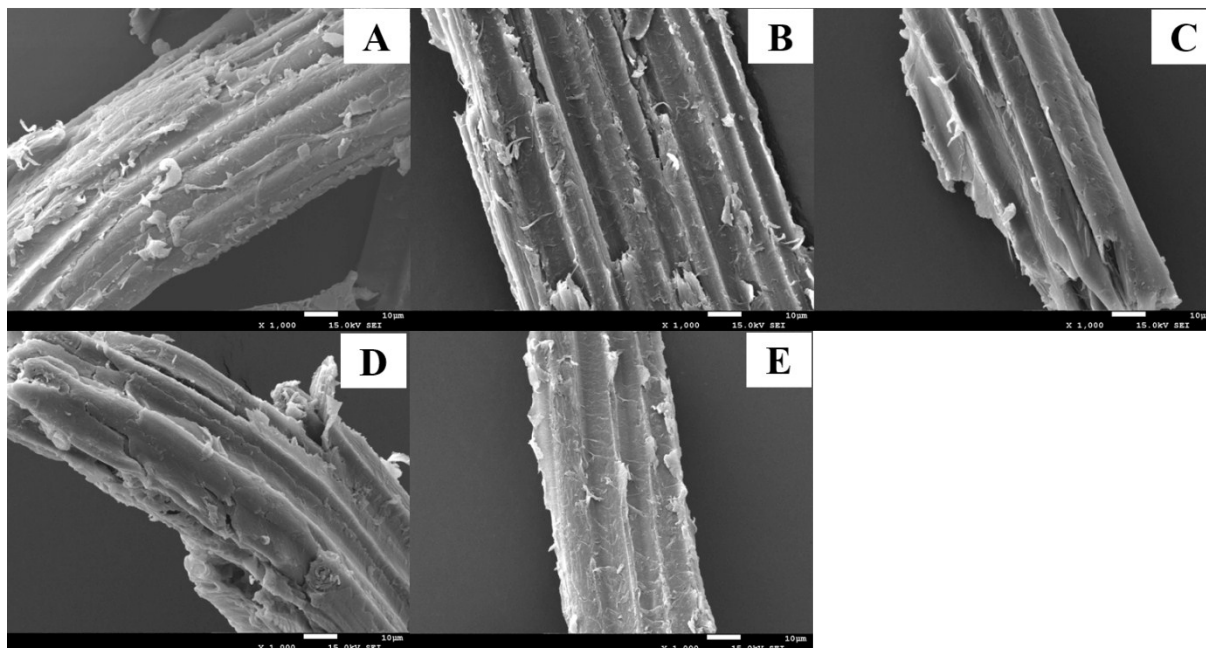

**Figure S3** SEM micrographs of *pubescens* feedstock and solid residues obtained with microwave hydrothermal treatment at different temperature: (A) *pubescens* feedstock; (B) 140 °C; (C) 160 °C; (D) 180 °C; (E) 190 °C.

## IV. THERMOGRAVIMETRY ANALYSIS

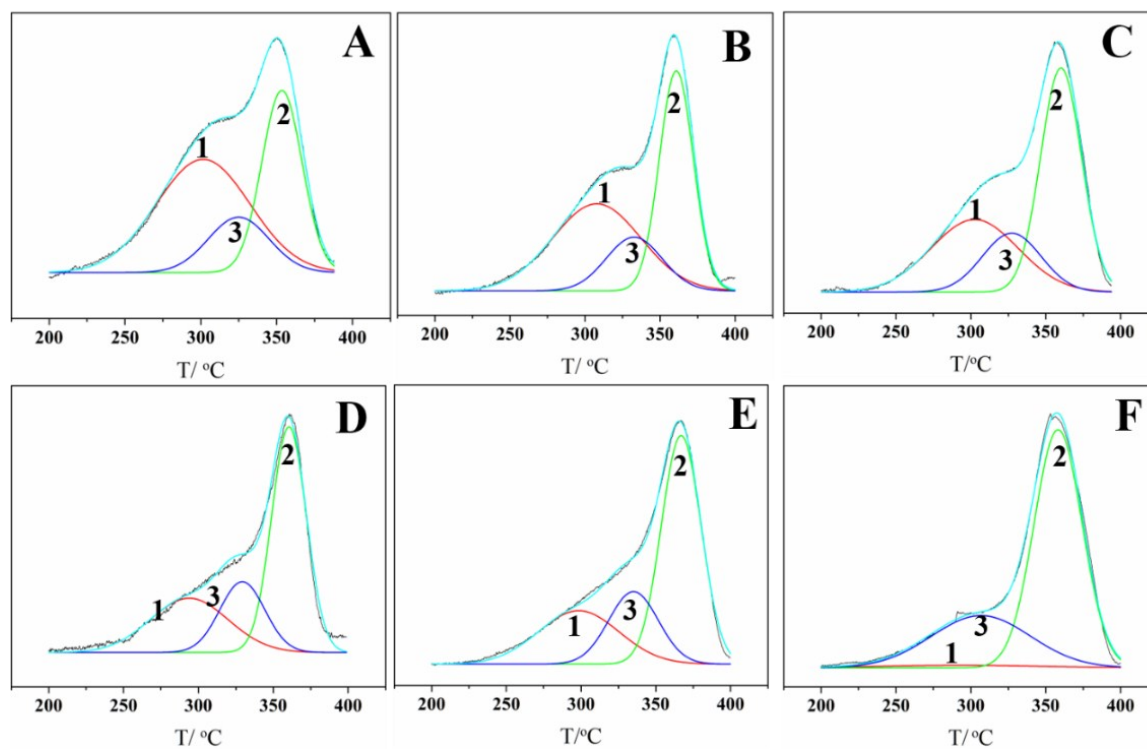

**Figure S4** Fitted DTG curves of hemicellulose, cellulose and lignin components in *pubescens* feedstock and solid residues obtained with microwave hydrothermal treatment at different temperature: (A) *pubescens*; (B) 140 °C; (C) 160 °C; (D) 180 °C; (E) 190 °C; (F) 200 °C.

## V. PY-GC/MS ANALYSIS

The pyrolysis compounds were identified in the NIST computer libraries. Semi-quantification was based on the peak areas, considering the total peak area as 100%. The relative peak area of individual product was calculated by dividing the total areas of all the peaks. The syringyl/guaiacyl(S/G) ratio was calculated by dividing the sum of syringyl units peak areas by the sum of guaiacyl units peak areas. The identification and relative peak area of the compounds released after Py-GC/MS of *pubescens*, and residues with microwave treatment at 200 °C were shown in Table S2.

**Table S2** The pyrolysis products released after Py-GC/MS of *pubescens* and residues with microwave treatment at 200 °C

| No.                         | R.T.(min) | Compound name                                   | Relative area / % |                    |
|-----------------------------|-----------|-------------------------------------------------|-------------------|--------------------|
|                             |           |                                                 | <i>Pubescens</i>  | Residues at 200 °C |
| <b>Lignin guaiacyl-type</b> |           |                                                 |                   |                    |
| 1                           | 9.533     | Phenol, 2-methoxy-                              | 1.26              | 1.63               |
| 2                           | 11.134    | Creosol                                         | 0.75              | 1.19               |
| 3                           | 12.882    | 2-Methoxy-4-vinylphenol                         | 3.79              | 3.76               |
| 4                           | 13.477    | Phenol, 2-methoxy-5-(1-propenyl)-, (E)-         | 0.87              | 0.46               |
| 5                           | 14.037    | Vanillin, acetate                               | 0.76              | 0.92               |
| 6                           | 14.140    | Phenol, 2-methoxy-5-(1-propenyl)-, (E)-         | 0.24              | -                  |
| 7                           | 14.620    | 1,2,4-Trimethoxybenzene                         | 1.93              | 4.58               |
| 8                           | 14.677    | Phenol, 2-methoxy-5-(1-propenyl)-, (E)-         | 1.31              | -                  |
| 9                           | 15.157    | p-Cymene-2,5-diol                               | 0.41              | 0.43               |
| Sum                         |           |                                                 | 11.32             | 12.97              |
| <b>Lignin syringyl-type</b> |           |                                                 |                   |                    |
| 10                          | 13.374    | Phenol, 2,6-dimethoxy-                          | 5.10              | 6.17               |
| 11                          | 15.614    | 2,5-Dimethoxybenzoic acid                       | 0.45              | 0.92               |
| 12                          | 16.094    | 2',4'-Dimethoxyacetophenone                     | 4.18              | 4.10               |
| 13                          | 16.528    | (E)-2,6-Dimethoxy-4-(prop-1-en-1-yl)phenol      | 0.92              | 1.16               |
| 14                          | 17.1      | Phenol, 2,6-dimethoxy-4-(2-propenyl)-           | 0.78              | 0.77               |
| 15                          | 17.203    | Benzaldehyde, 4-hydroxy-3,5-dimethoxy-          | 1.38              | 2.34               |
| 16                          | 17.443    | 2-Allyl-1,4-dimethoxy-3-methyl-benzene          | 0.65              | 0.70               |
| 17                          | 17.66     | (E)-2,6-Dimethoxy-4-(prop-1-en-1-yl)phenol      | 3.99              | 4.46               |
| 18                          | 18.037    | Ethanone, 1-(4-hydroxy-3,5-dimethoxyphenyl)-    | 1.35              | 1.37               |
| 19                          | 18.151    | (E)-4-(3-Hydroxyprop-1-en-1-yl)-2-methoxyphenol | 0.18              | 0.44               |
| 20                          | 18.426    | 3,5-Dimethoxy-4-hydroxyphenylacetic acid        | 2.00              | 1.20               |
| 21                          | 20.574    | 3,5-Dimethoxy-4-hydroxycinnamaldehyde           | 1.09              | 1.15               |
| 22                          | 20.986    | trans-Sinapyl alcohol                           | 1.17              | 1.14               |
| Sum                         |           |                                                 | 23.23             | 25.92              |
| <b>S/G</b>                  |           |                                                 | <b>2.05</b>       | <b>2.00</b>        |

## VI. MICROWAVE-ASSISTED TREATMENT OF SOFTWOOD AND WHEAT STRAW

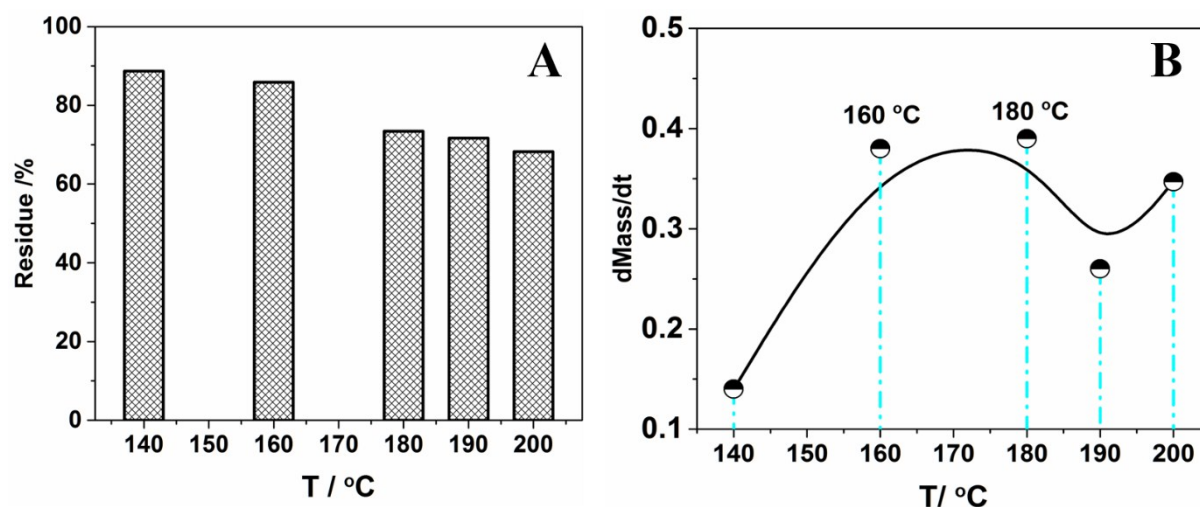

**Figure S5** Microwave-assisted hydrothermal conversion of softwood with holding time of 5 min:(A) The variation of residue content with microwave treatment at different temperatures; (B) The effect of temperature on the mass loss rate of softwood.

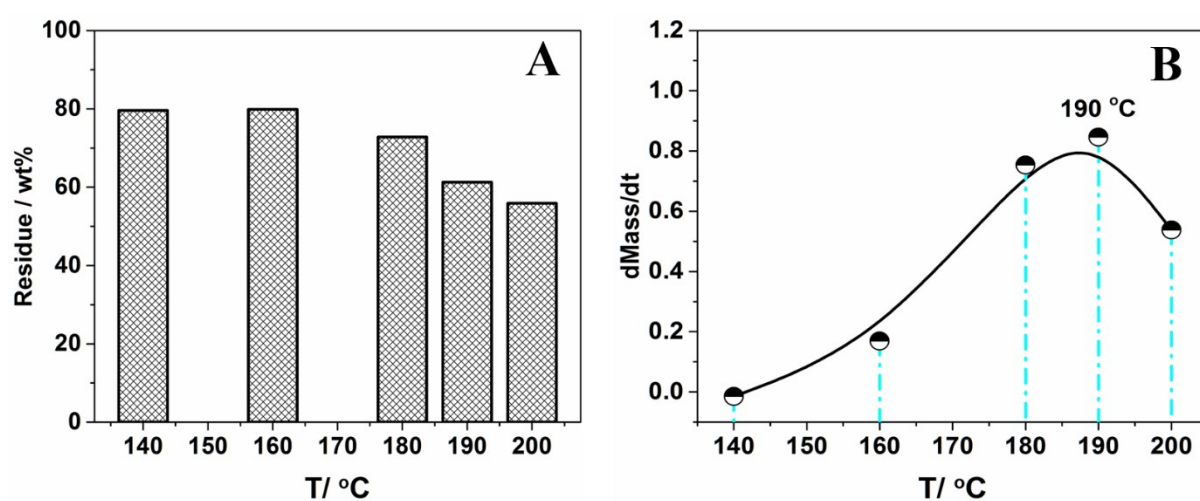

**Figure S6** Microwave-assisted hydrothermal conversion of wheat straw with holding time of 5 min:(A) The variation of residue content with microwave treatment at different temperatures; (B) The effect of temperature on the mass loss rate of wheat straw.

## VII. THERMOGRAVIMETRIC ANALYSIS RESULTS OF SOFTWOOD AND WHEAT STRAW

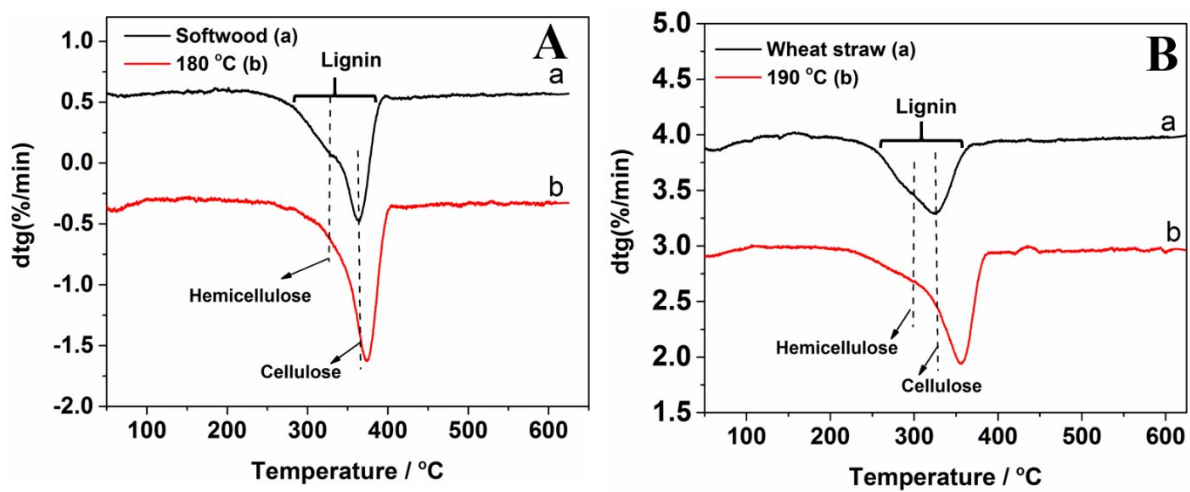

**Figure S7** The DTG curves of softwood (A) and wheat straw (B) by thermogravimetric analysis.



VI.  $^{13}\text{C}$  NMR ANALYSIS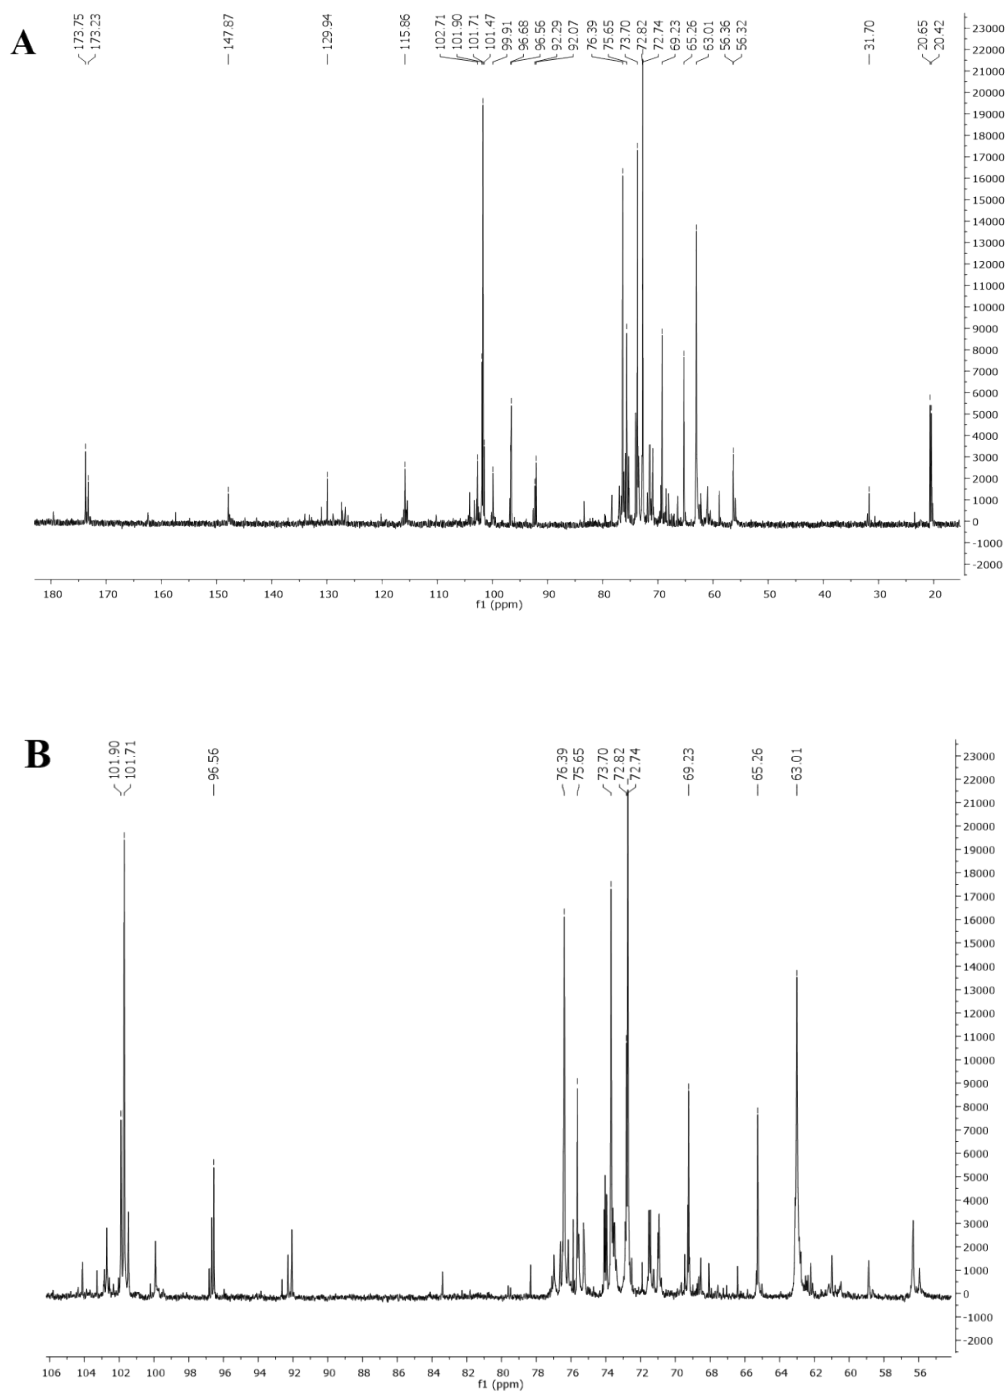

**Figure S8**  $^{13}\text{C}$  NMR results of hydrolysate obtained with microwave hydrothermal treatment at 200 °C: (A) chemical shifts from 10-180 ppm; (B) chemical shifts from 54-106 ppm

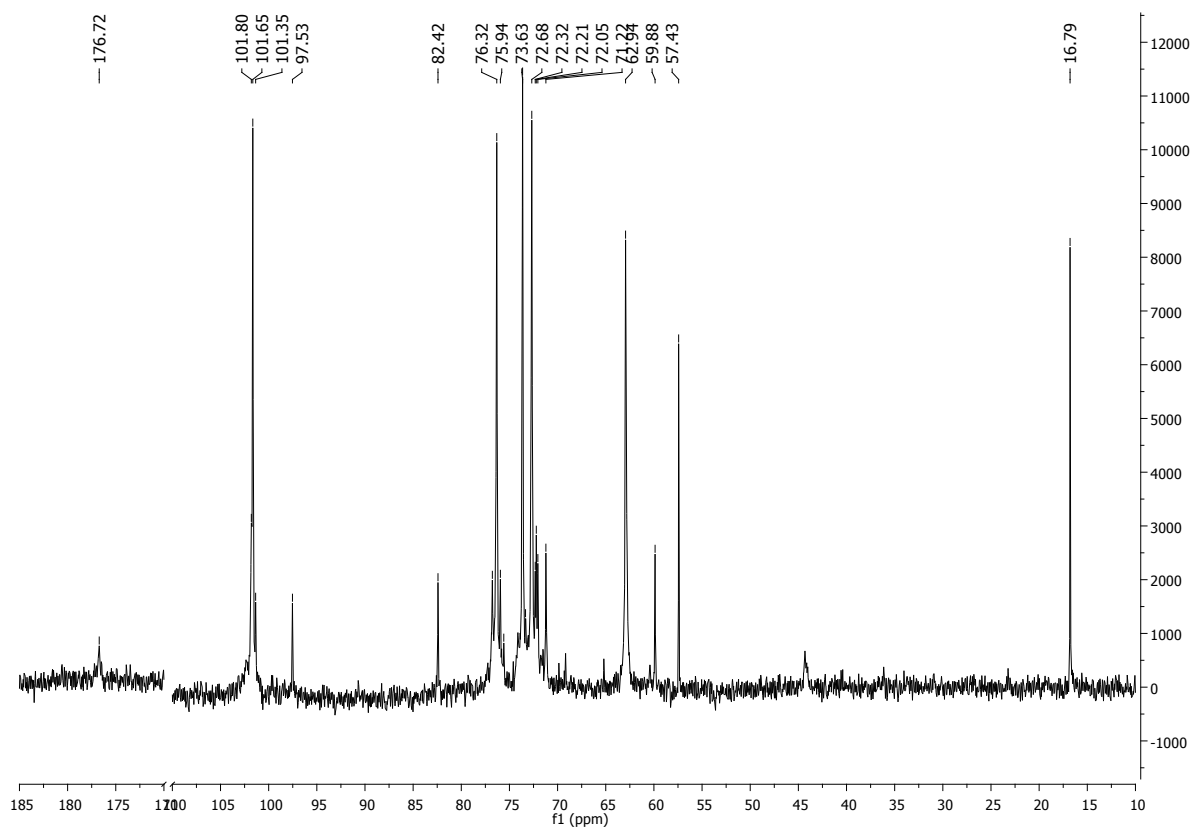

Figure S9  $^{13}\text{C}$  NMR spectra of xylan from birch wood in  $\text{D}_2\text{O}$

## IX. 2D HSQC NMR ANALYSIS

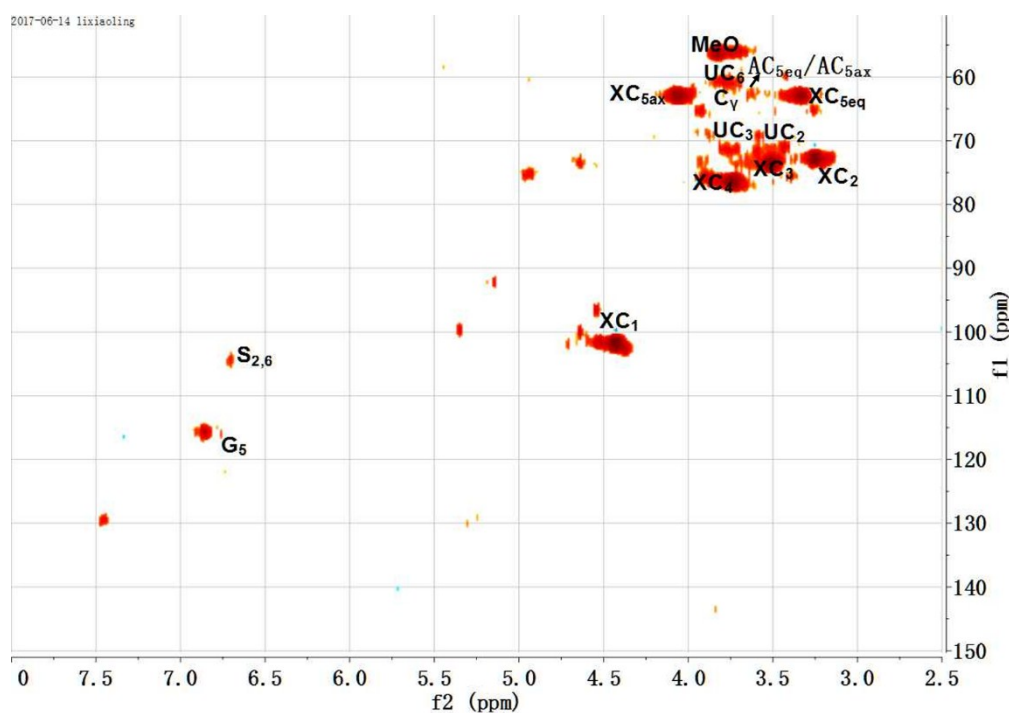

**Figure S10** 2D HSQC NMR spectra of the liquid fraction obtained with microwave treatment at 200 °C

**Table S3** Assignment of main hemicellulose and lignin  $^{13}\text{C}$ - $^1\text{H}$  correlation signals in HSQC spectra of liquid fraction<sup>1</sup>

| Lables                                                        | $\delta_{\text{C}}/\delta_{\text{H}}$ | Assignment                                                              |
|---------------------------------------------------------------|---------------------------------------|-------------------------------------------------------------------------|
| MeO                                                           | 56.0/3.71                             | C-H in methoxyls                                                        |
| $\text{X}_{\text{C}1}$                                        | 102.4/4.33                            | C-1 in $\beta$ -D-xylp                                                  |
| $\text{X}_{\text{C}2}$                                        | 73.3/3.21                             | C-2 in $\beta$ -D-xylp                                                  |
| $\text{X}_{\text{C}3}$                                        | 73.9/3.40                             | C-3 in $\beta$ -D-xylp                                                  |
| $\text{X}_{\text{C}4}$                                        | 75.9/3.66                             | C-4 in $\beta$ -D-xylp                                                  |
| $\text{X}_{\text{C}5\text{eq}}$                               | 63.3/3.27                             | C-5eq in $\beta$ -D-xylp, (eq) equatorial                               |
| $\text{X}_{\text{C}5\text{ax}}$                               | 63.3/3.96                             | C-5ax in $\beta$ -D-xylp, (ax) axial                                    |
| $\text{A}_{\text{C}5\text{eq}}/\text{A}_{\text{C}5\text{ax}}$ | 61.7/3.58                             | C-5eq/C-5ax in $\alpha$ -L-Araf, (eq) equatorial/(ax) axial             |
| $\text{U}_{\text{C}2}$                                        | 71.7/3.46                             | C-2 in $\alpha$ -D-GlcpA                                                |
| $\text{U}_{\text{C}3}$                                        | 73.4/3.68                             | C-3 in $\alpha$ -D-GlcpA                                                |
| $\text{U}_{\text{C}6}$                                        | 59.9/3.76                             | C-6 in $\alpha$ -D-GlcpA                                                |
| $\text{C}_{\text{V}}$                                         | 62.7/3.73                             | $\text{C}_{\text{V}}\text{-H}_{\text{V}}$ in $\beta$ -5' structures (C) |
| $\text{S}_{2,6}$                                              | 104.4/6.72                            | $\text{C}_{2,6}\text{-H}_{2,6}$ in syringyl units (S)                   |
| $\text{G}_5$                                                  | 114.9-115.9/6.75                      | $\text{C}_5\text{-H}_5$ in guaiacyl units (G)                           |

The results showed that the main hemicellulose signals correspond to C-1, C-2, C-3, C-4, C-5eq and C-5ax of  $\beta$ -D-xylp were observed. While some signals of side chains assigned to C-5eq/C-5ax of  $\alpha$ -L-Araf, C-2, C-3 and C-6 of  $\alpha$ -D-GlcpA were observed with weak intensity. The main lignin  $^{13}\text{C}$ - $^1\text{H}$  correlation signals in side-chain region ( $\delta_{\text{C}}/\delta_{\text{H}}$  50-103/2.6-6.0 ppm) and in the aromatic region ( $\delta_{\text{C}}/\delta_{\text{H}}$  103-145/6.0-8.0 ppm) for the HSQC spectra of liquid fraction were weak, only OCH<sub>3</sub>, S<sub>2,6</sub> (correspond to C<sub>2,6</sub>-H<sub>2,6</sub> in syringyl units) and G5 (C<sub>5</sub>-H<sub>5</sub> in guaiacyl units) signals in lignin were observed in 2D HSQC spectra. The results suggested that most lignin retained in the solid residue after microwave hydrothermal treatment at 200 °C, which were consisted with Py-GC/MS results (Table S2). This further confirmed that the efficient extraction of hemicellulose with microwave treatment at 200 °C was achieved.

## References

1. D. Yang, L. X. Zhong, T. Q. Yuan, X. W. Peng, R. C. Sun, *Ind. Crops Prod.*, 2013, **43**, 141
